# Supplementary material for: Comparative efficacy and safety of different anti-VEGF agents combined with different delivery methods for neovascular glaucoma: a systematic review and Bayesian network meta-analysis
Source: HighWire-hosted journal article supplement (doi:10.1136/bmjopen-2023-080103), 2024-03-01
Supplement: bmjopen-2023-080103supp003_data_supplement.pdf [file bmjopen-2023-080103supp003_data_supplement.pdf]

3, Risk of bias assessment (the revised Cochrane risk-of-bias tool for randomized trials (RoB2))

Risk of bias graph

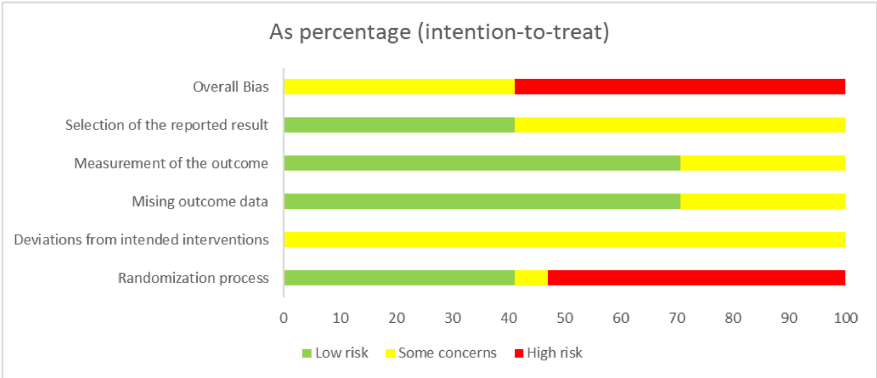

Risk of bias summary: it is a summary table of review authors’ judgments for each risk of bias entriy for each study

|                     | Randomization process | Deviations from intended interventions | Missing outcome data | Measurement of the outcome | Selection of the reported result | Overall Bias |   |
|---------------------|-----------------------|----------------------------------------|----------------------|----------------------------|----------------------------------|--------------|---|
| Elisabeth Wittström | ?                     | ?                                      | +                    | +                          | +                                | ?            | + |
| Enyr S. Arcieri     | +                     | ?                                      | +                    | +                          | +                                | !            | ? |
| Ling Bai            | +                     | ?                                      | +                    | +                          | +                                | !            | ? |
| Reda A. Mahdy       | ?                     | ?                                      | +                    | +                          | +                                | ?            |   |
| Shahin Yazdani      | +                     | ?                                      | +                    | +                          | +                                | !            |   |
| Xiaohong Guo        | ?                     | ?                                      | +                    | ?                          | +                                | ?            |   |
| Yue Deng            | ?                     | ?                                      | +                    | +                          | +                                | ?            |   |
| FENG Xi-Min         | ?                     | ?                                      | ?                    | +                          | ?                                | ?            |   |
| GOU Jianyuan        | +                     | ?                                      | +                    | +                          | ?                                | !            |   |
| Guo Fei             | +                     | ?                                      | +                    | +                          | ?                                | !            |   |
| LI Shuang           | ?                     | ?                                      | ?                    | +                          | ?                                | ?            |   |
| LIN Zhihui          | +                     | ?                                      | +                    | +                          | ?                                | !            |   |
| XI Wen-jing         | ?                     | ?                                      | ?                    | ?                          | ?                                | ?            |   |
| Xu Lei              | ?                     | ?                                      | +                    | ?                          | ?                                | ?            |   |
| Zhen-zhen Yan       | +                     | ?                                      | ?                    | +                          | ?                                | !            |   |
| ZHANG Jian          | ?                     | ?                                      | ?                    | ?                          | ?                                | ?            |   |
| Zhou Lin            | ?                     | ?                                      | +                    | ?                          | ?                                | ?            |   |
