# Supplementary material for: Comparative efficacy and safety of different anti-VEGF agents combined with different delivery methods for neovascular glaucoma: a systematic review and Bayesian network meta-analysis
Source: HighWire-hosted journal article supplement (doi:10.1136/bmjopen-2023-080103), 2024-03-01

**5a-Plots of SUCRA for the primary efficacy outcome (IOP at 1 month), the larger the area under the curve, the higher the ranking.**

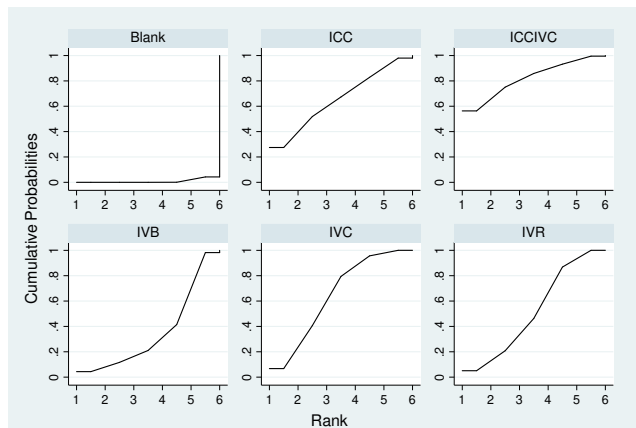

**5b-Comparison-adjusted funnel plot for the primary efficacy outcome (IOP 1month) from the network meta-analysis**

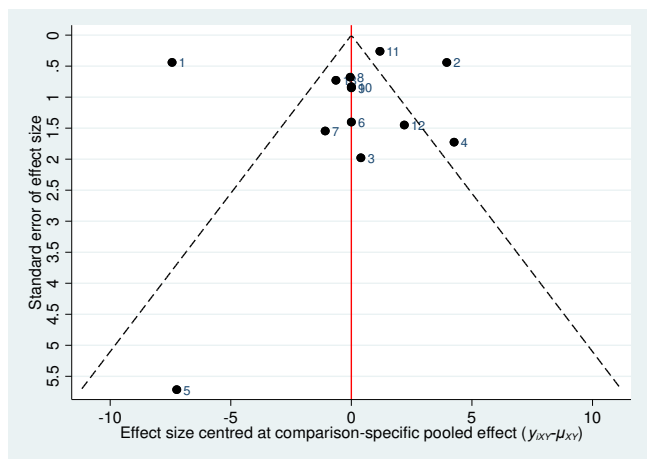

Supplement: bmjopen-2023-080103supp005_data_supplement.pdf [file bmjopen-2023-080103supp005_data_supplement.pdf]
