# Supplementary material for: Comparative efficacy and safety of different anti-VEGF agents combined with different delivery methods for neovascular glaucoma: a systematic review and Bayesian network meta-analysis
Source: HighWire-hosted journal article supplement (doi:10.1136/bmjopen-2023-080103), 2024-03-01
Supplement: bmjopen-2023-080103supp007_data_supplement.pdf [file bmjopen-2023-080103supp007_data_supplement.pdf]

**7a-Plots of SUCRA for the secondary efficacy outcomes (success rate), the larger the area under the curve, the higher the ranking.**

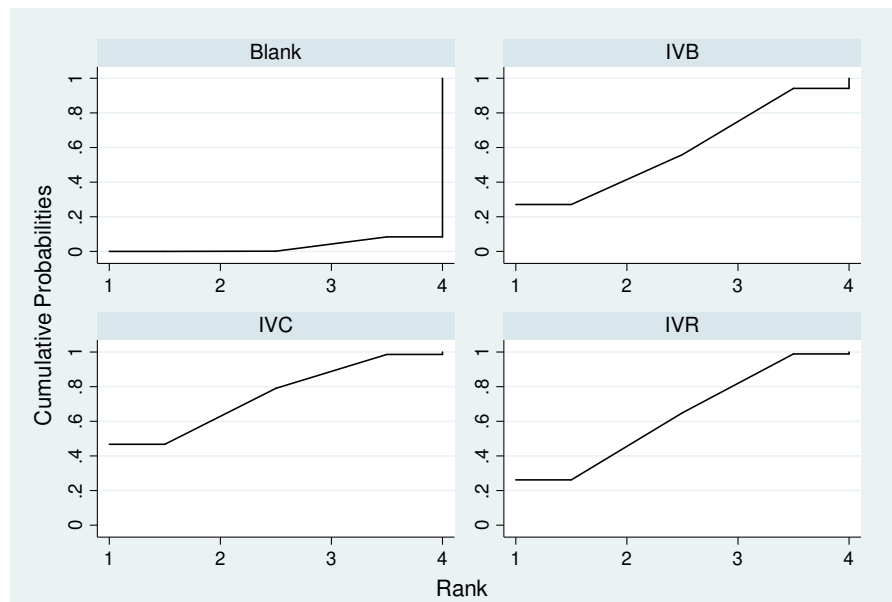

**7b-Comparison-adjusted funnel plot for the secondary efficacy outcomes (success rate) from the network meta-analysis**

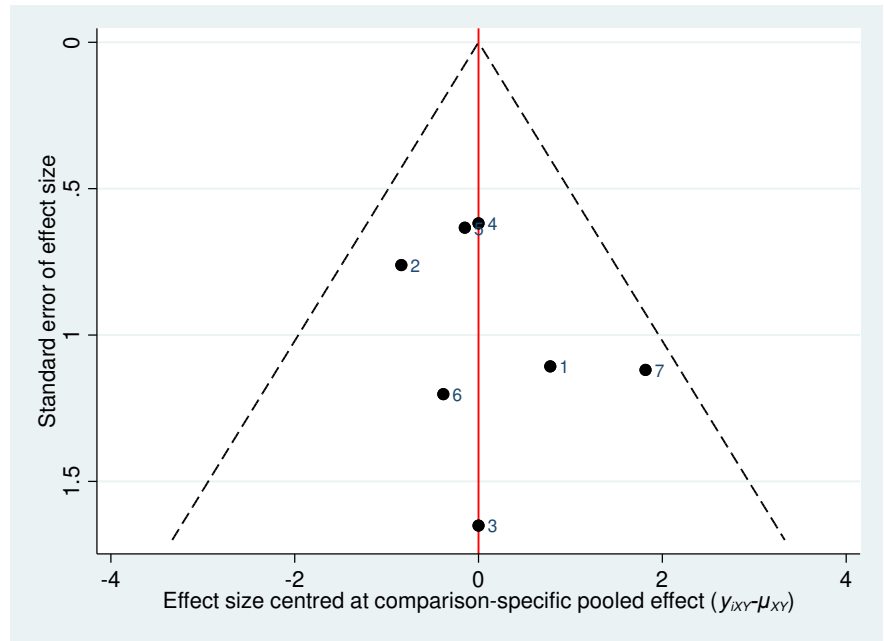

7c-Network plot of available treatment comparisons for the secondary efficacy outcomes (success rate).

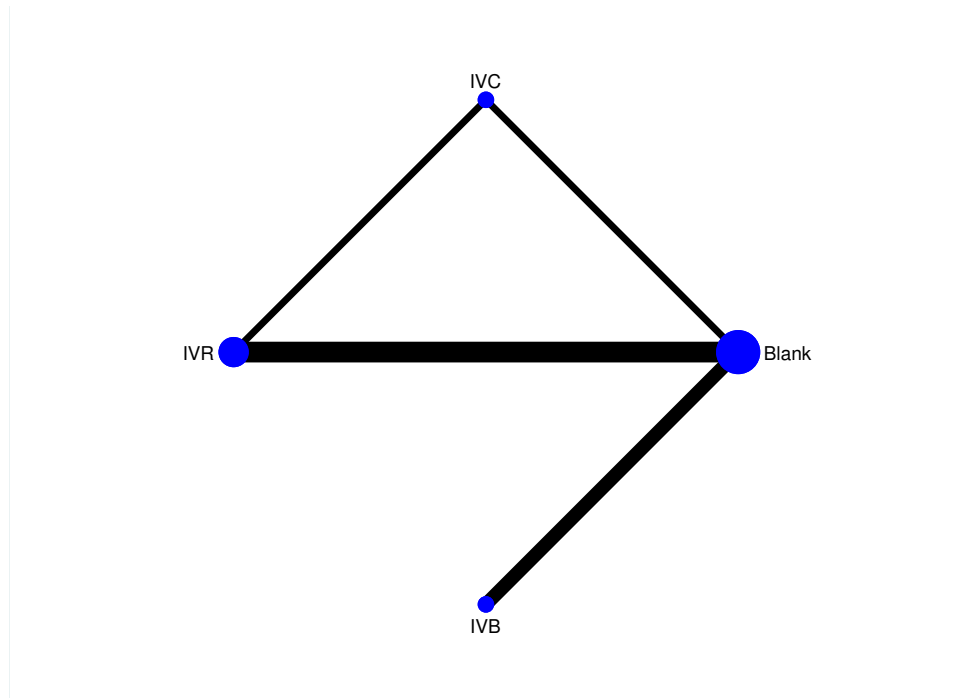

7d-The results of network meta-analysis for the secondary efficacy outcomes (success rate).

|                  |                  |                |                  |
|------------------|------------------|----------------|------------------|
| IVC              | 0.32(0.013,8.33) | NA             | 4.17(1.23,14.29) |
| 0.47(0.00,12.28) | IVR              | NA             | 4(1.47,10)       |
| 0.60(0.00,49.75) | 1.31(0.03,125.9) | IVB            | 4.35(0.33,50)    |
| 8.20(0.40,1177)  | 3.83(0.24,43.69) | 4.99(0.22,164) | Blank            |
