# Supplementary material for: Comparative efficacy and safety of different anti-VEGF agents combined with different delivery methods for neovascular glaucoma: a systematic review and Bayesian network meta-analysis
Source: HighWire-hosted journal article supplement (doi:10.1136/bmjopen-2023-080103), 2024-03-01
Supplement: bmjopen-2023-080103supp008_data_supplement.pdf [file bmjopen-2023-080103supp008_data_supplement.pdf]

**8a-Plots of SUCRA for the secondary efficacy outcomes (visual retention rate), the larger the area under the curve, the higher the ranking.**

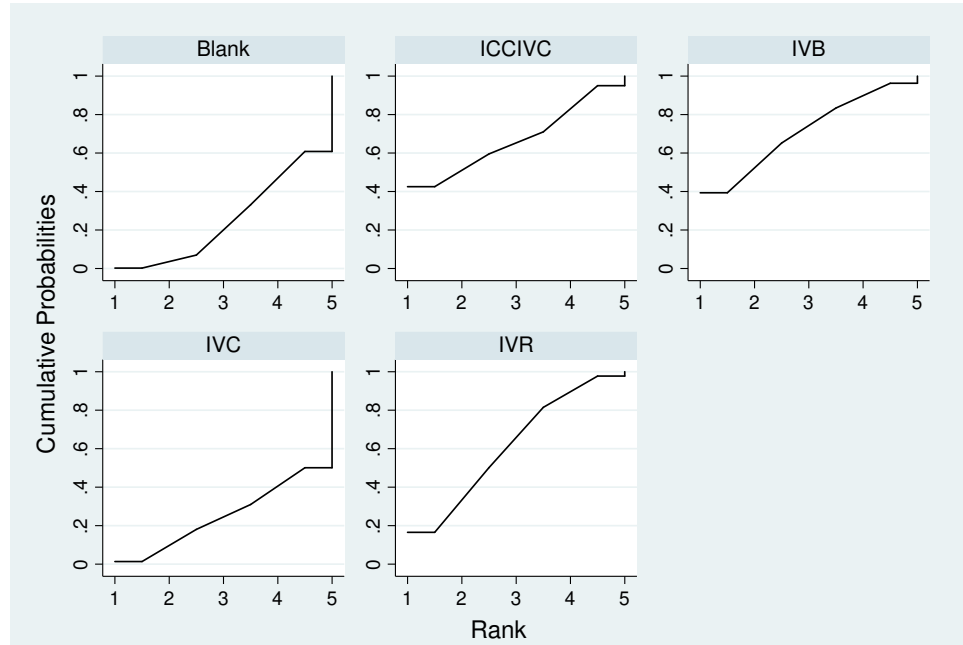

**8b-Comparison-adjusted funnel plot for the secondary efficacy outcomes (visual retention rate) from the network meta-analysis**

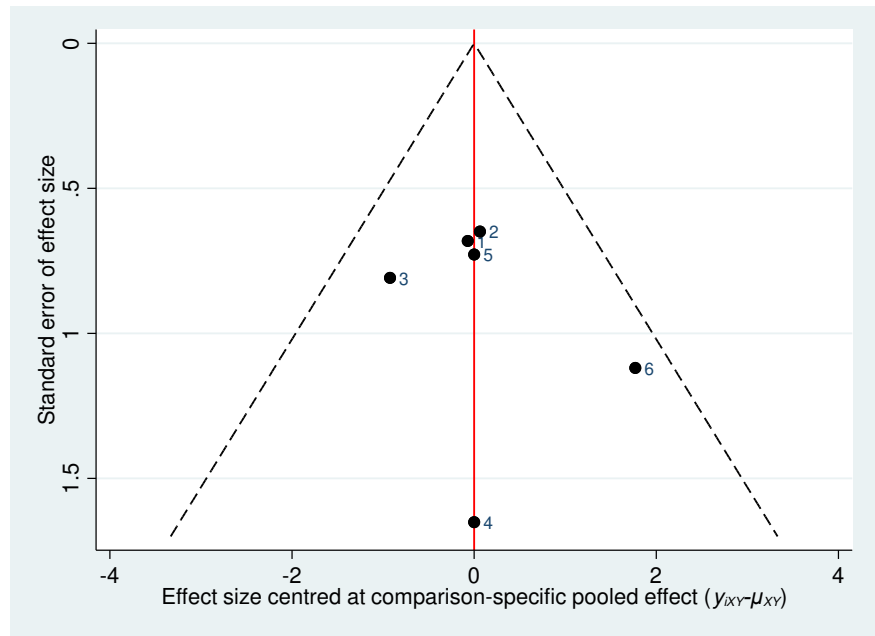

8c-Network plot of available treatment comparisons for the secondary efficacy outcomes (visual retention rate).

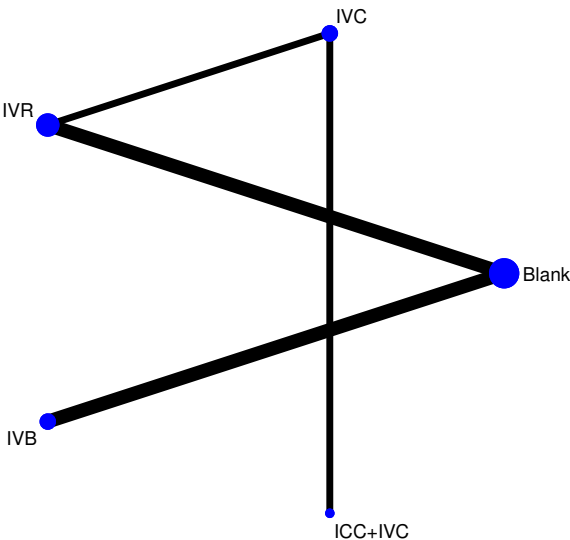

8d-The results of network meta-analysis for the secondary efficacy outcomes (visual retention rate).

|                    |                    |                   |                   |               |
|--------------------|--------------------|-------------------|-------------------|---------------|
| IVC                | 4.17(1.01,16.67)   | NA                | 3.13(0.12,100)    | NA            |
| 4.20 (0.59,29.91)  | ICCIVC             | NA                | NA                | NA            |
| 1.26 (0.03,53.55)  | 3.33 (0.05,228.84) | Blank             | 2.44(0.97,6.25)   | 4.35(0.32,50) |
| 3.09 (0.09,102.86) | 1.36 (0.02,75.54)  | 2.45 (0.65,9.22)  | IVR               | NA            |
| 4.70 (0.08,291.49) | 1.12 (0.01,108.11) | 3.73 (0.66,20.93) | 1.52 (0.17,13.44) | IVB           |
