# Supplementary material for: Comparative efficacy and safety of different anti-VEGF agents combined with different delivery methods for neovascular glaucoma: a systematic review and Bayesian network meta-analysis
Source: HighWire-hosted journal article supplement (doi:10.1136/bmjopen-2023-080103), 2024-03-01
Supplement: bmjopen-2023-080103supp010_data_supplement.pdf [file bmjopen-2023-080103supp010_data_supplement.pdf]

**10a-Plots of SUCRA for the secondary outcomes (non-surgical IOP at 1 month), the larger the area under the curve, the higher the ranking.**

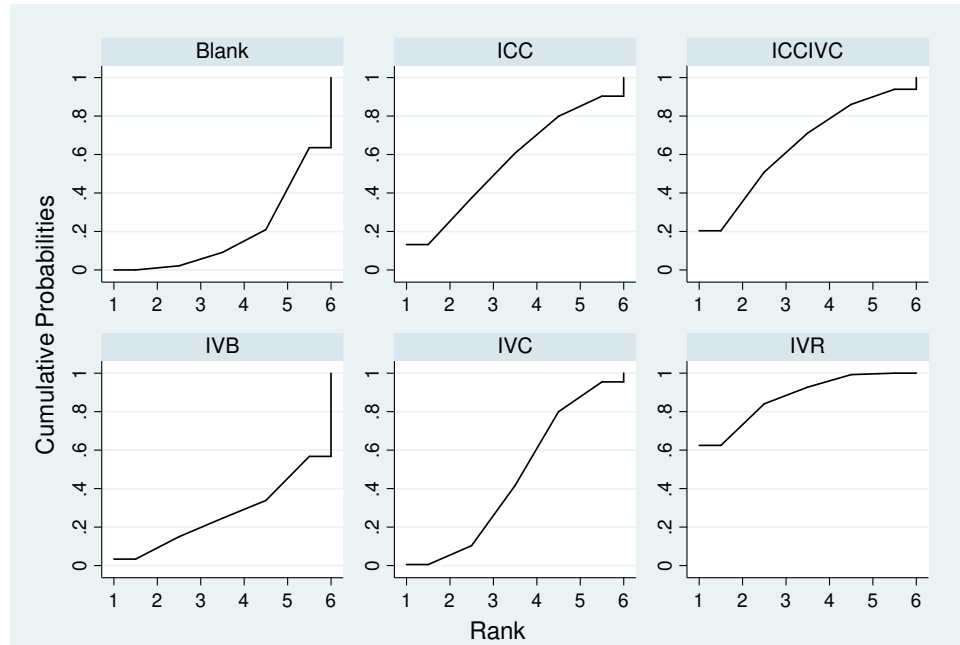

**10b-Comparison-adjusted funnel plot for the secondary outcomes (non-surgical IOP at 1 month) from the network meta-analysis**

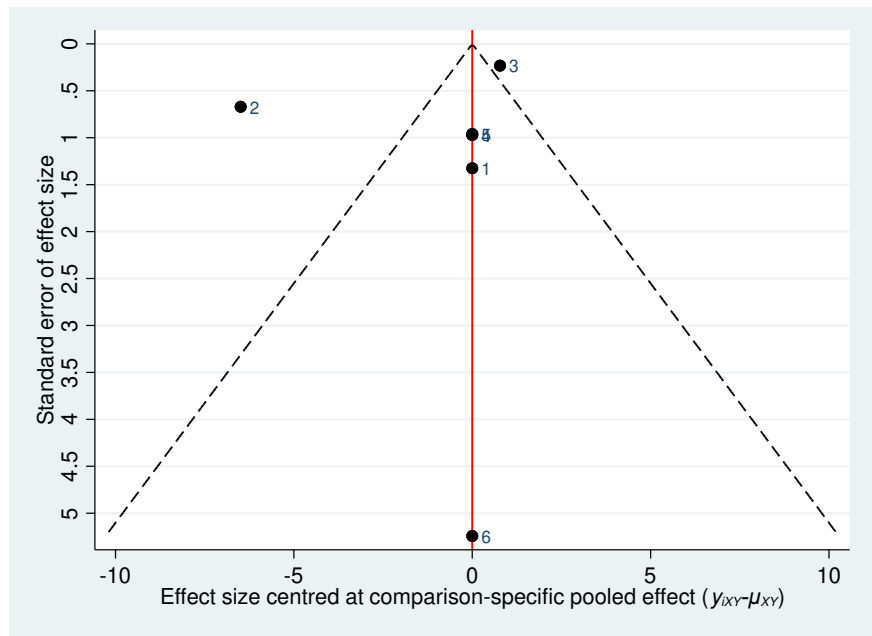

10c-Network plot of available treatment comparisons for the secondary outcomes (non-surgical IOP at 1 month).

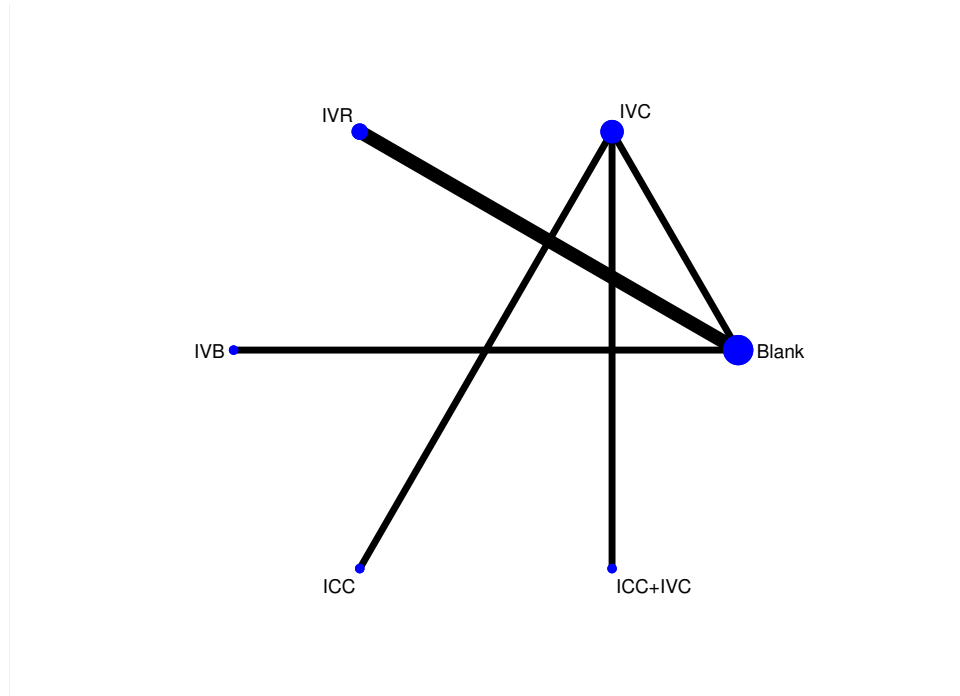

10d-The results of network meta-analysis for the secondary outcomes (non-surgical IOP at 1 month).

|                     |                     |                      |                     |                     |                      |
|---------------------|---------------------|----------------------|---------------------|---------------------|----------------------|
| IVR                 | NA                  | NA                   | NA                  | NA                  | -13.54(-20.66,-6.41) |
| 4.99(-7.55, 17.57)  | ICCIVC              | NA                   | -3.33(-5.21,-1.45)  | NA                  | NA                   |
| 6.51(-5.99, 19.07)  | -1.51(-12.68, 9.66) | ICC                  | -1.81(-3.71,0.09)   | NA                  | NA                   |
| -8.30(-18.06, 1.42) | -3.30(-11.19, 4.61) | -1.79(-9.66, 6.08)   | IVC                 | NA                  | -5.24(-7.84,-2.64)   |
| 13.23(-0.46, 27.03) | -8.24(-25.20, 8.73) | -6.73(-23.69, 10.29) | 4.94(-10.13, 19.90) | IVB                 | -0.30(-10.58,9.98)   |
| -13.5(-18.98,-8.03) | -8.50(-19.79, 2.76) | -6.99(-18.28,4.31)   | -5.20(-13.27,2.86)  | -0.26(-12.92,12.45) | Blank                |
